# Supplementary material for: Effects of ertugliflozin on renal function over 104 weeks of treatment: a post hoc analysis of two randomised controlled trials
Source: Springer Nature journal article supplement (doi:10.1007/s00125-020-05133-4), 2020-03-31
Supplement: MOESM1 [file 17852290]

## Electronic Supplementary Materials

## Tables

**ESM Table 1** Phase III VERTIS clinical studies included in the pooled analysis

|                                                                                                     | <b>VERTIS MET</b>                                                                                                     | <b>VERTIS SU</b>         |
|-----------------------------------------------------------------------------------------------------|-----------------------------------------------------------------------------------------------------------------------|--------------------------|
| ClinicalTrials.gov identifier                                                                       | NCT02033889                                                                                                           | NCT01999218              |
| <i>N</i> (randomised)                                                                               | 621                                                                                                                   | 1316 <sup>a</sup>        |
| <i>N</i> at baseline (non-ertugliflozin/ertugliflozin 5mg/ertugliflozin 15 mg)                      | 209/207/205                                                                                                           | 435/445/435              |
| <i>N</i> at start of Phase B (non-ertugliflozin/ertugliflozin 5mg/ertugliflozin 15 mg) <sup>b</sup> | 190/201/190                                                                                                           | 349/337/351              |
| Inclusion criteria                                                                                  |                                                                                                                       |                          |
| Background antihyperglycaemic therapy                                                               | Metformin (≥1500 mg/day for ≥8 weeks)                                                                                 |                          |
| HbA <sub>1c</sub> (inclusive), mmol/mol (%)                                                         | 53–91 (7.0–10.5)                                                                                                      | 53–75 (7.0–9.0)          |
| eGFR, mL min <sup>-1</sup> 1.73 m <sup>-2</sup>                                                     | ≥55                                                                                                                   |                          |
| Comparator                                                                                          | Placebo/glimepiride <sup>c</sup>                                                                                      | Glimepiride <sup>a</sup> |
|                                                                                                     | Patients received placebo for the first 26 weeks of the study and then blinded glimepiride for the remaining 78 weeks |                          |

<sup>a</sup>One patient randomised to ertugliflozin 15 mg did not take study medication and is not included in the pooled analysis. <sup>b</sup>Phase B started at week 26 and week 52 in the VERTIS MET and VERTIS SU studies, respectively.

<sup>c</sup>Glimepiride was initiated at 1 mg/day and up-titrated to a maximum of 6 or 8 mg/day according to the local label or maximum tolerated dose

**ESM Table 2** Change in UACR by categories of changes from baseline in HbA<sub>1c</sub> at 26, 52 and 104 weeks

| Time point | Category of reduction in HbA <sub>1c</sub> (mmol/mol [%]) | Treatment group     | n   | Mean change in UACR from baseline (mg/mmol [SD]) | Difference vs non-ertugliflozin |                      |
|------------|-----------------------------------------------------------|---------------------|-----|--------------------------------------------------|---------------------------------|----------------------|
|            |                                                           |                     |     |                                                  | LSM (mg/mmol [95% CI])          | p value <sup>a</sup> |
| Week 26    | >6 (>0.5)                                                 | Non-ertugliflozin   | 337 | -1.4 (30.7)                                      | –                               | –                    |
|            |                                                           | Ertugliflozin 5 mg  | 315 | -0.2 (11.5)                                      | 1.2 (-1.8, 4.2)                 | 0.45                 |
|            |                                                           | Ertugliflozin 15 mg | 332 | -1.2 (9.4)                                       | 0.2 (-2.8, 3.2)                 | 0.91                 |
|            | >3 to ≤6 (>0.3 to ≤0.5)                                   | Non-ertugliflozin   | 72  | 0.7 (10.5)                                       | –                               | –                    |
|            |                                                           | Ertugliflozin 5 mg  | 95  | 0.3 (4.5)                                        | -0.4 (-2.7, 1.9)                | 0.71                 |
|            |                                                           | Ertugliflozin 15 mg | 89  | -0.9 (6.9)                                       | -1.7 (-4.0, 0.6)                | 0.15                 |
|            | ≤3 (≤0.3)                                                 | Non-ertugliflozin   | 152 | 1.3 (7.0)                                        | –                               | –                    |
|            |                                                           | Ertugliflozin 5 mg  | 174 | 0.3 (11.5)                                       | -1.0 (-2.8, 0.8)                | 0.27                 |
|            |                                                           | Ertugliflozin 15 mg | 147 | -0.1 (3.8)                                       | -1.4 (-3.3, 0.5)                | 0.14                 |
| Week 52    | >6 (>0.5)                                                 | Non-ertugliflozin   | 328 | -1.5 (29.5)                                      | –                               | –                    |
|            |                                                           | Ertugliflozin 5 mg  | 272 | -1.3 (8.4)                                       | 0.2 (-2.8, 3.3)                 | 0.88                 |

| Time point | Category of reduction in HbA <sub>1c</sub> (mmol/mol [%]) | Treatment group     | n   | Mean change in UACR from baseline (mg/mmol [SD]) | Difference vs non-ertugliflozin |                      |
|------------|-----------------------------------------------------------|---------------------|-----|--------------------------------------------------|---------------------------------|----------------------|
|            |                                                           |                     |     |                                                  | LSM (mg/mmol [95% CI])          | p value <sup>a</sup> |
| Week 104   | >3 to ≤6 (>0.3 to ≤0.5)                                   | Ertugliflozin 15 mg | 315 | -0.6 (9.7)                                       | 0.9 (-2.0, 3.9)                 | 0.53                 |
|            |                                                           | Non-ertugliflozin   | 57  | 0.7 (8.9)                                        | -                               | -                    |
|            |                                                           | Ertugliflozin 5 mg  | 90  | -0.1 (4.1)                                       | -0.8 (-3.2, 1.5)                | 0.49                 |
|            |                                                           | Ertugliflozin 15 mg | 72  | 1.1 (8.2)                                        | 0.4 (-2.1, 2.8)                 | 0.76                 |
|            |                                                           | Non-ertugliflozin   | 121 | 0.8 (12.4)                                       | -                               | -                    |
|            |                                                           | Ertugliflozin 5 mg  | 144 | 1.9 (16.5)                                       | 1.1 (-1.9, 4.1)                 | 0.47                 |
|            | <=3 (<=0.3)                                               | Ertugliflozin 15 mg | 121 | 0.1 (4.3)                                        | -0.6 (-3.8, 2.5)                | 0.69                 |
|            |                                                           | Non-ertugliflozin   | 221 | -0.9 (36.5)                                      | -                               | -                    |
|            |                                                           | Ertugliflozin 5 mg  | 211 | -1.1 (11.9)                                      | -0.2 (-4.6, 4.2)                | 0.94                 |
|            |                                                           | Ertugliflozin 15 mg | 224 | -0.4 (11.8)                                      | 0.5 (-3.8, 4.9)                 | 0.81                 |
|            |                                                           | Non-ertugliflozin   | 51  | 1.8 (11.2)                                       | -                               | -                    |
|            |                                                           | Ertugliflozin 5 mg  | 60  | -1.7 (10.5)                                      | -3.5 (-7.0, -0.0)               | <0.05                |

| Time point | Category of reduction in HbA <sub>1c</sub> (mmol/mol [%]) | Treatment group     | n   | Mean change in UACR from baseline (mg/mmol [SD]) | Difference vs non-ertugliflozin |                      |
|------------|-----------------------------------------------------------|---------------------|-----|--------------------------------------------------|---------------------------------|----------------------|
|            |                                                           |                     |     |                                                  | LSM (mg/mmol [95% CI])          | p value <sup>a</sup> |
|            |                                                           | Ertugliflozin 15 mg | 62  | -0.8 (5.3)                                       | -2.6 (-6.1, 0.8)                | 0.13                 |
|            |                                                           | Non-ertugliflozin   | 132 | 4.1 (36.0)                                       | -                               | -                    |
|            | ≤3 (≤0.3)                                                 | Ertugliflozin 5 mg  | 135 | -0.1 (7.6)                                       | -4.2 (-9.5, 1.2)                | 0.13                 |
|            | ≤3 (≤0.3)                                                 | Ertugliflozin 15 mg | 122 | -0.4 (11.1)                                      | -4.5 (-10.0, 1.0)               | 0.11                 |

**ESM Table 3** Change in eGFR by categories of changes from baseline in HbA<sub>1c</sub> at 26, 52 and 104 weeks

| Time point | Category of reduction in HbA <sub>1c</sub> (mmol/mol) | Treatment group     | n   | Mean change in eGFR from baseline (mL min <sup>-1</sup> 1.73 m <sup>-2</sup> [SD]) | Difference vs non-ertugliflozin |                      |
|------------|-------------------------------------------------------|---------------------|-----|------------------------------------------------------------------------------------|---------------------------------|----------------------|
|            |                                                       |                     |     |                                                                                    | LSM (mg/mmol [95% CI])          | p value <sup>a</sup> |
| Week 26    | >6 (>0.5)                                             | Non-ertugliflozin   | 346 | -0.2 (10.8)                                                                        | -                               | -                    |
|            |                                                       | Ertugliflozin 5 mg  | 318 | 2.1 (13.5)                                                                         | 2.4 (0.4, 4.3)                  | 0.02                 |
|            |                                                       | Ertugliflozin 15 mg | 341 | 1.0 (13.7)                                                                         | 1.3 (-0.6, 3.2)                 | 0.20                 |
|            | >3 to ≤6 (>0.3 to ≤0.5)                               | Non-ertugliflozin   | 74  | 0.6 (9.5)                                                                          | -                               | -                    |
|            |                                                       | Ertugliflozin 5 mg  | 96  | 0.3 (13.6)                                                                         | -0.3 (-4.2, 3.6)                | 0.87                 |
|            |                                                       | Ertugliflozin 15 mg | 90  | 0.0 (13.8)                                                                         | -0.5 (-4.5, 3.4)                | 0.79                 |
|            | ≤3 (≤0.3)                                             | Non-ertugliflozin   | 160 | 0.8 (11.5)                                                                         | -                               | -                    |
|            |                                                       | Ertugliflozin 5 mg  | 181 | -0.9 (12.0)                                                                        | -1.7 (-4.3, 0.8)                | 0.18                 |
|            |                                                       | Ertugliflozin 15 mg | 150 | -3.2 (12.2)                                                                        | -4.0 (-6.7, -1.4)               | <0.01                |
| Week 52    | >6 (>0.5)                                             | Non-ertugliflozin   | 335 | -0.0 (13.0)                                                                        | -                               | -                    |
|            |                                                       | Ertugliflozin 5 mg  | 277 | 1.7 (12.5)                                                                         | 1.7 (-0.4, 3.8)                 | 0.11                 |

| Time point | Category of reduction in HbA <sub>1c</sub> (mmol/mol) | Treatment group     | n   | Mean change in eGFR from baseline (mL min <sup>-1</sup> 1.73 m <sup>-2</sup> [SD]) | Difference vs non-ertugliflozin |                      |
|------------|-------------------------------------------------------|---------------------|-----|------------------------------------------------------------------------------------|---------------------------------|----------------------|
|            |                                                       |                     |     |                                                                                    | LSM (mg/mmol [95% CI])          | p value <sup>a</sup> |
| Week 104   | >3 to ≤6 (>0.3 to ≤0.5)                               | Ertugliflozin 15 mg | 325 | 1.2 (13.6)                                                                         | 1.3 (-0.7, 3.2)                 | 0.21                 |
|            |                                                       | Non-ertugliflozin   | 60  | 0.9 (11.2)                                                                         | –                               | –                    |
|            |                                                       | Ertugliflozin 5 mg  | 93  | 0.8 (12.7)                                                                         | -0.1 (-4.0, 3.8)                | 0.96                 |
|            |                                                       | Ertugliflozin 15 mg | 71  | -1.0 (11.8)                                                                        | -1.9 (-6.1, 2.3)                | 0.37                 |
|            | ≤3 (≤0.3)                                             | Non-ertugliflozin   | 130 | -0.2 (12.9)                                                                        | –                               | –                    |
|            |                                                       | Ertugliflozin 5 mg  | 150 | -0.7 (12.7)                                                                        | -0.5 (-3.5, 2.5)                | 0.73                 |
|            |                                                       | Ertugliflozin 15 mg | 124 | -2.3 (12.5)                                                                        | -2.2 (-5.3, 1.0)                | 0.17                 |
|            |                                                       | Non-ertugliflozin   | 225 | -2.1 (13.2)                                                                        | –                               | –                    |
|            | >6 (>0.5)                                             | Ertugliflozin 5 mg  | 212 | 0.5 (13.2)                                                                         | 2.6 (-0.0, 5.2)                 | 0.05                 |
|            |                                                       | Ertugliflozin 15 mg | 230 | 0.5 (15.4)                                                                         | 2.6 (0.0, 5.2)                  | <0.05                |
|            |                                                       | Non-ertugliflozin   | 52  | -5.3 (15.2)                                                                        | –                               | –                    |
|            |                                                       | Ertugliflozin 5 mg  | 61  | -0.2 (14.2)                                                                        | 5.1 (-0.5, 10.7)                | 0.07                 |



| Time point | Category of reduction in HbA <sub>1c</sub> (mmol/mol) | Treatment group     | n   | Mean change in eGFR from baseline (mL min <sup>-1</sup> 1.73 m <sup>-2</sup> [SD]) | Difference vs non-ertugliflozin |                      |
|------------|-------------------------------------------------------|---------------------|-----|------------------------------------------------------------------------------------|---------------------------------|----------------------|
|            |                                                       |                     |     |                                                                                    | LSM (mg/mmol [95% CI])          | p value <sup>a</sup> |
|            |                                                       | Ertugliflozin 15 mg | 63  | 1.9 (15.7)                                                                         | 7.1 (1.6, 12.7)                 | 0.01                 |
|            |                                                       | Non-ertugliflozin   | 136 | -0.6 (12.9)                                                                        | -                               | -                    |
|            | ≤3 (≤0.3)                                             | Ertugliflozin 5 mg  | 139 | 0.1 (13.2)                                                                         | 0.7 (-2.4, 3.8)                 | 0.66                 |
|            | ≤3 (≤0.3)                                             | Ertugliflozin 15 mg | 128 | -1.8 (13.3)                                                                        | -1.2 (-4.4, 2.0)                | 0.46                 |

**ESM Table 4** Incidence of renal-related AEs by system organ class and preferred term

| <b>Patients with <math>\geq 1</math> renal-related AE, <i>n</i> (%)</b> | <b>Non-ertugliflozin (N=644)</b> | <b>Ertugliflozin 5 mg (N=652)</b> | <b>Ertugliflozin 15 mg (N=640)</b> |
|-------------------------------------------------------------------------|----------------------------------|-----------------------------------|------------------------------------|
| Renal and urinary disorders                                             | 2 (0.3)                          | 2 (0.3)                           | 4 (0.6)                            |
| Acute kidney injury                                                     | 0 (0.0)                          | 0 (0.0)                           | 2 (0.3)                            |
| Renal failure                                                           | 0 (0.0)                          | 0 (0.0)                           | 1 (0.2)                            |
| Renal impairment                                                        | 2 (0.3)                          | 2 (0.3)                           | 1 (0.2)                            |

**ESM Table 5** Summary of electrolyte changes from baseline at week 104

|                            | <b>Non-ertugliflozin<br/>(N=644)</b> | <b>Ertugliflozin 5 mg<br/>(N=652)</b> | <b>Ertugliflozin 15 mg<br/>(N=640)</b> |
|----------------------------|--------------------------------------|---------------------------------------|----------------------------------------|
| <b>Sodium, mmol/l</b>      |                                      |                                       |                                        |
| Baseline (SD)              | <i>n</i> = 627<br>141.30 (2.55)      | <i>n</i> = 628<br>141.11 (2.49)       | <i>n</i> = 625<br>141.18 (2.57)        |
| Change from baseline       | <i>n</i> = 406<br>-0.87 (2.72)       | <i>n</i> = 401<br>-0.34 (2.50)        | <i>n</i> = 417<br>-0.33 (2.60)         |
| <b>Potassium, mmol/l</b>   |                                      |                                       |                                        |
| Baseline (SD)              | <i>n</i> = 627<br>4.58 (0.44)        | <i>n</i> = 626<br>4.54 (0.40)         | <i>n</i> = 621<br>4.54 (0.38)          |
| Change from baseline       | <i>n</i> = 404<br>-0.05 (0.49)       | <i>n</i> = 399<br>-0.06 (0.37)        | <i>n</i> = 413<br>-0.06 (0.39)         |
| <b>Calcium, mmol/l</b>     |                                      |                                       |                                        |
| Baseline (SD)              | <i>n</i> = 626<br>2.4 (0.1)          | <i>n</i> = 625<br>2.4 (0.1)           | <i>n</i> = 621<br>2.4 (0.1)            |
| Change from baseline       | <i>n</i> = 406<br>-0.02 (0.15)       | <i>n</i> = 400<br>-0.01 (0.11)        | <i>n</i> = 413<br>-0.01 (0.11)         |
| <b>Bicarbonate, mmol/l</b> |                                      |                                       |                                        |
| Baseline (SD)              | <i>n</i> = 607<br>23.6 (2.3)         | <i>n</i> = 612<br>23.7 (2.5)          | <i>n</i> = 602<br>23.6 (2.5)           |
| Change from baseline       | <i>n</i> = 389<br>0.43 (2.61)        | <i>n</i> = 388<br>0.16 (2.71)         | <i>n</i> = 399<br>-0.18 (2.70)         |
| <b>Magnesium, mEq/l</b>    |                                      |                                       |                                        |
| Baseline (SD)              | <i>n</i> = 627<br>0.8 (0.1)          | <i>n</i> = 627<br>0.8 (0.1)           | <i>n</i> = 621<br>0.8 (0.1)            |
| Change from baseline       | <i>n</i> = 406<br>-0.00 (0.07)       | <i>n</i> = 401<br>0.04 (0.08)         | <i>n</i> = 413<br>0.06 (0.07)          |
| <b>Phosphate, mmol/l</b>   |                                      |                                       |                                        |
| Baseline (SD)              | <i>n</i> = 626                       | <i>n</i> = 627                        | <i>n</i> = 625                         |

|                      |                |                |                |
|----------------------|----------------|----------------|----------------|
|                      | 1.2 (0.2)      | 1.2 (0.2)      | 1.2 (0.2)      |
| Change from baseline | <i>n</i> = 406 | <i>n</i> = 401 | <i>n</i> = 417 |
|                      | 0.00 (0.16)    | 0.02 (0.15)    | 0.05 (0.16)    |

---

Data are presented as mean (SD)

## Figures

**ESM Fig. 1** VERTIS MET study design

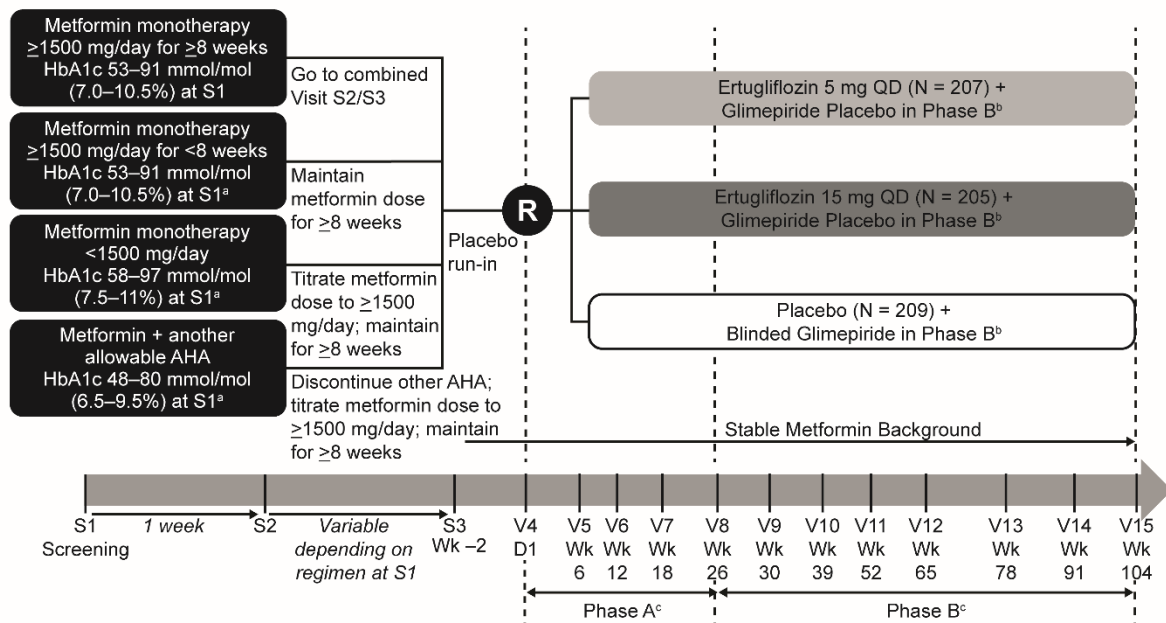

<sup>a</sup>Participants were randomised only if HbA<sub>1c</sub> at S3 was 53–91 mmol/mol (7.0–10.5%). <sup>b</sup>Blinded glimepiride/glimepiride placebo was only for participants not receiving glycaemic rescue in Phase A and whose fasting fingerstick glucose was  $\geq 6.1$  mmol/l ( $\geq 110$  mg/dl). <sup>c</sup>Glycaemic rescue therapy (open-label glimepiride) and open-label basal insulin initiated for participants who met progressively more stringent glycaemic thresholds in Phase A; basal insulin also initiated in Phase B for participants who met glycaemic thresholds.

AHA, anti-hyperglycaemic agent; D, day; N, number of randomised participants in each treatment group; R, randomisation; S, screening; V, visit; Wk, Week

Figure from Gallo et al. 2019 under the terms of the Creative Commons Attribution-NonCommercial-NoDerivatives 4.0 International license (<https://creativecommons.org/licenses/by-nc-nd/4.0/>). The following changes have been made to the figure: superscripts in letters (originally in symbols), depiction of the HbA<sub>1c</sub> inclusion criterion in mmol/mol, the display of some text on additional lines and changes to the figure legend text (use of glycaemic instead of glycemic and addition of VERTIS in the abbreviations).

**ESM Fig. 2** VERTIS SU study design

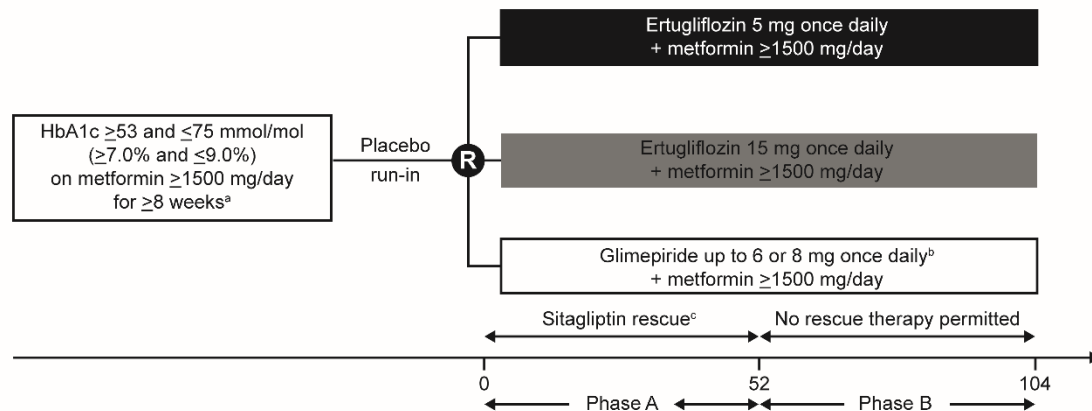

X-axis values are weeks. <sup>a</sup>Patients on one of the following regimens were also eligible to enter the screening period and could enroll in the study if they met entry criteria after the wash-off/dose titration/stabilisation period: on metformin monotherapy ≥1500 mg/day <8 weeks, HbA<sub>1c</sub> ≥53 mmol/mol and ≤75 mmol/mol (≥7.0% and ≤9.0%) – patients were to maintain metformin dose ≥1500 mg/day for ≥8 weeks; on metformin monotherapy <1500 mg/day and with HbA<sub>1c</sub> ≥58 mmol/mol and ≤80 mmol/mol (≥7.5% and ≤9.5%) – patients were titrated to metformin ≥1500 mg/day and were to maintain metformin dose for ≥8 weeks; on metformin + single allowable antihyperglycaemic agent<sup>d</sup> and HbA<sub>1c</sub> ≥48 mmol/mol and ≤69 mmol/mol (≥6.5% and ≤8.5%) – patients were to discontinue non-metformin AHA, titrate metformin to ≥1500 mg/day (if necessary), and maintain metformin dose ≥1500 mg/day for ≥8 weeks (≥10 weeks for patients discontinuing SU therapy). <sup>b</sup>Glimepiride was initiated at 1 mg once daily and up-titrated to a maximum of 6 or 8 mg/day according to the local label or maximum tolerated dose. <sup>c</sup>Patients rescued with sitagliptin in Phase A were not eligible to enter Phase B; patients were not rescued during Phase B. <sup>d</sup>This included SUs at <50% of the maximum approved dose in the local country label, dipeptidyl peptidase-4 inhibitors, meglitinides or alpha glucosidase inhibitors.

AHA, antihyperglycaemic agent; SU, sulfonylurea; R, randomisation

Figure from Hollander et al. 2019 under the terms of the Creative Commons Attribution-NonCommercial-NoDerivatives 4.0 International license (<https://creativecommons.org/licenses/by-nc-nd/4.0/>). The following changes have been made to the figure: text in normal font (originally bold font was used) and changes to the figure legend text (use of antihyperglycaemic instead of antihyperglycemic and addition of VERTIS in the abbreviations).
